# Supplementary material for: Upconverting and NIR emitting rare earth based nanostructures for NIR-bioimaging
Source: Royal Society of Chemistry journal article supplement (doi:10.1039/c3nr02286b), 2013-01-01
Supplement: c3nr02286b.pdf [file c3nr02286b.pdf]

# Upconverting and NIR Emitting Rare Earth based Nanostructures for NIR-Bioimaging

Eva Hemmer, \*<sup>a,b,1</sup> Nallusamy Venkatachalam,<sup>a</sup> Hiroshi Hyodo,<sup>a,b</sup> Akito Hattori,<sup>b</sup> Yoshie Ebina,<sup>b</sup> Hidehiro Kishimoto,<sup>a,c</sup> and Kohei Soga<sup>a,b</sup>

## Supplementary Information

### Sample Overview

Table 1 gives an overview of the various Y<sub>2</sub>O<sub>3</sub>:Ln<sup>3+</sup> and Gd<sub>2</sub>O<sub>3</sub>:Ln<sup>3+</sup> nanostructures prepared in our group, their synthesis method, particle size as well as *in-vitro*, respectively *in-vivo* experiments that have been conducted with the respective nanostructures.

**Table 1.** Sample overview.

| Sample                                          | Method                    | Precipitant        | Surfactant | Size (nm) | <i>in-vitro</i> / <i>in-vivo</i> Experiment*                                        |
|-------------------------------------------------|---------------------------|--------------------|------------|-----------|-------------------------------------------------------------------------------------|
| Y <sub>2</sub> O <sub>3</sub> :Er <sup>3+</sup> |                           |                    |            |           |                                                                                     |
|                                                 | alkaline precipitation    | NH <sub>4</sub> OH | -          | 100-1000  |                                                                                     |
|                                                 | homogeneous precipitation | urea               | SDS        | 500       | • macrophage cytotoxicity <sup>1</sup>                                              |
|                                                 | homogeneous precipitation | urea               | -          | 280       | • macrophage cytotoxicity <sup>2</sup>                                              |
|                                                 | homogeneous precipitation | urea               | PEG        | 250       | • B-cell and macrophage cytotoxicity <sup>3</sup><br>• cellular uptake <sup>3</sup> |
|                                                 | homogeneous precipitation | urea               | PS20       | 200       |                                                                                     |
|                                                 | homogeneous precipitation | urea               | CTAB       | 100       | • macrophage cytotoxicity <sup>1</sup>                                              |
|                                                 | homogeneous precipitation | urea               | PAAc       | 40-50     | • macrophage cytotoxicity <sup>1,2</sup><br>• cellular uptake <sup>1,2</sup>        |
|                                                 | enzymatic precipitation   | urea               | -          | 10-30     |                                                                                     |

<sup>1</sup> N. Venkatachalam, T. Yamano, E. Hemmer, H. Hyodo, H. Kishimoto and K. Soga, *J. Am. Ceram. Soc.*, 2013, in print (DOI: 10.1111/jace.12476).

<sup>2</sup> N. Venkatachalam, Y. Okumura, K. Soga, R. Fukuda and T. Tsuji, *J. Phys.: Conf. Series*, 2009, **191**, 012002.

<sup>3</sup> N. Venkatachalam, E. Hemmer, T. Yamano, H. Hyodo, H. Kishimoto and K. Soga, *Prog. Cryst. Growth Charact. Mat.*, 2012, **58**, 121.

| Gd <sub>2</sub> O <sub>3</sub> :Er <sup>3+</sup> ,Yb <sup>3+</sup> |                           |                                 |               |           |                                                                                                                                                               |  |
|--------------------------------------------------------------------|---------------------------|---------------------------------|---------------|-----------|---------------------------------------------------------------------------------------------------------------------------------------------------------------|--|
| Rods5                                                              | hydrothermal              | ammonia                         | -             | 160 x 600 | • B-cell and macrophage cytotoxicity <sup>4,5</sup><br>• cellular uptake <sup>4</sup><br>• biodistribution <sup>4</sup><br>• multicolour imaging <sup>6</sup> |  |
| Rods12                                                             | hydrothermal              | aqueous KOH                     | -             | 40 x 1000 | • B-cell and macrophage cytotoxicity <sup>5</sup>                                                                                                             |  |
| ParticlesAP                                                        | alkaline precipitation    | Na <sub>2</sub> CO <sub>3</sub> | -             | 100-1000  | • B-cell cytotoxicity <sup>5</sup>                                                                                                                            |  |
| ParticlesHP                                                        | homogeneous precipitation | urea                            | -             | 300       | • B-cell and macrophage cytotoxicity <sup>4,5</sup><br>• biodistribution <sup>4</sup>                                                                         |  |
| ParticlesHP-CTAB                                                   | homogeneous precipitation | urea                            | CTAB          | 120       | • macrophage cytotoxicity <sup>4,5</sup><br>• cellular uptake <sup>4</sup><br>• biodistribution <sup>4</sup>                                                  |  |
| ParticlesHP-CTAB-PEG                                               | homogeneous precipitation | urea                            | CTAB, PEG6000 | 80        | • biodistribution <sup>4</sup>                                                                                                                                |  |
| ParticlesEP                                                        | enzymatic precipitation   | urea                            | -             | 40        | • B-cell cytotoxicity <sup>5</sup>                                                                                                                            |  |
| ParticlesEP-CTAB                                                   | enzymatic precipitation   | urea                            | CTAB          | 30-40     |                                                                                                                                                               |  |
| Gd <sub>2</sub> O <sub>3</sub> :Ho <sup>3+</sup> ,Yb <sup>3+</sup> |                           |                                 |               |           |                                                                                                                                                               |  |
| ParticlesHP-CTAB-PEG                                               | homogeneous precipitation | urea                            | CTAB, PEG6000 | 80        | • biodistribution <sup>6</sup><br>• multicolour imaging <sup>6</sup>                                                                                          |  |

\* Also investigating the influence of the surface modification with PEG-*b*-PAAc on the cytotoxic behaviour

<sup>4</sup> E. Hemmer, H. Takeshita, T. Yamano, T. Fujiki, Y. Kohl, K. Löw, N. Venkatachalam, H. Hyodo, H. Kishimoto and K. Soga, *J. Mater. Sci.: Mater. Med.*, 2012, **23**, 2399.

<sup>5</sup> E. Hemmer, T. Yamano, H. Kishimoto, N. Venkatachalam, H. Hyodo and K. Soga, *Acta Biomater.*, 2013, **9**, 4734.

<sup>6</sup> This review

### Time-Resolved Biodistribution of $\text{Gd}_2\text{O}_3:\text{Er}^{3+}, \text{Yb}^{3+}$ Rods

Movie 1 shows the time-resolved distribution of the  $\text{Gd}_2\text{O}_3:\text{Er}^{3+}, \text{Yb}^{3+}$  nanorods (*Rods5*, modified with PEG-*b*-PAAc) in the mouse body through the blood vessel system. Integration time: 400 ms, Laser power: 4.5 W.

### Preliminary Long-Term Cytotoxicity Studies

In case of  $\text{Y}_2\text{O}_3:\text{Er}^{3+}$  nanoparticles, preliminary studies have been done in order to investigate the long-term effect of the nanostructures on the treated mice. Therefore, one set of mice was treated with nanoparticles (size: 250 nm, PEG-*b*-PAAc modified, single dose, 2.5 mg), while a second set of mice was untreated as control. Three weeks post-injection, the mice were sacrificed and the organs were dissected. We did not observe any abnormality in the obtained histological sections of organs of mice injected with particles when compared to the control (Figure 1). The injected mice did not show any pathological changes. For a deeper understanding of the long-term toxicity effect, respectively the effect of multi-dose injections, further experimental investigations are recently underway.

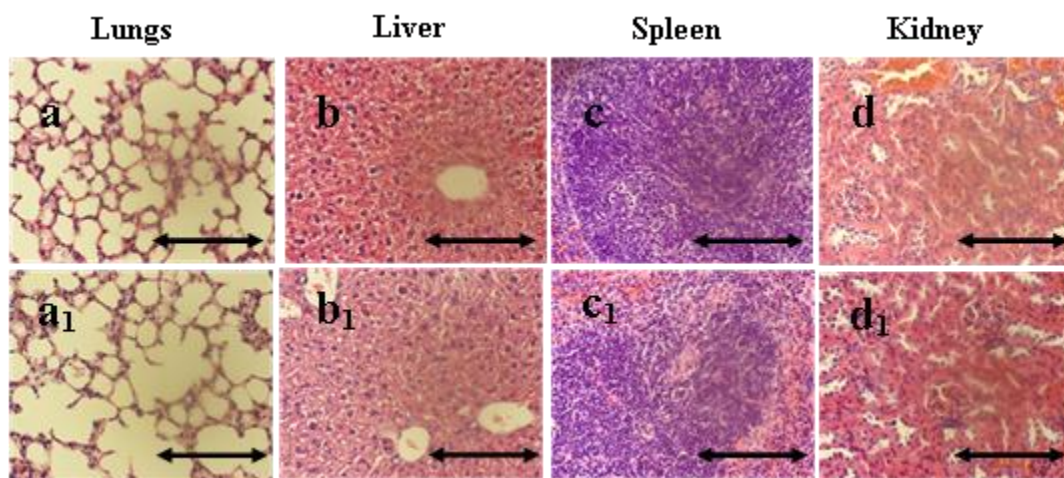

**Figure 1.** a)-d) Histological sections of organs from untreated mice (control). a<sub>1</sub>)-d<sub>1</sub>) Histological samples of mice three weeks post-injection (scale bar: 30 μm).
